# Supplementary material for: Global rewiring of cellular metabolism renders Saccharomyces cerevisiae Crabtree negative
Source: PubMed Central journal article supplement (PMC6076296; doi:10.1038/s41467-018-05409-9), 2018-08-03
Supplement: 41467_2018_5409_MOESM1_ESM.pdf [file 41467_2018_5409_MOESM1_ESM.pdf]

Global rewiring of cellular metabolism renders *Saccharomyces cerevisiae*  
Crabtree-negative

Dai *et al.*

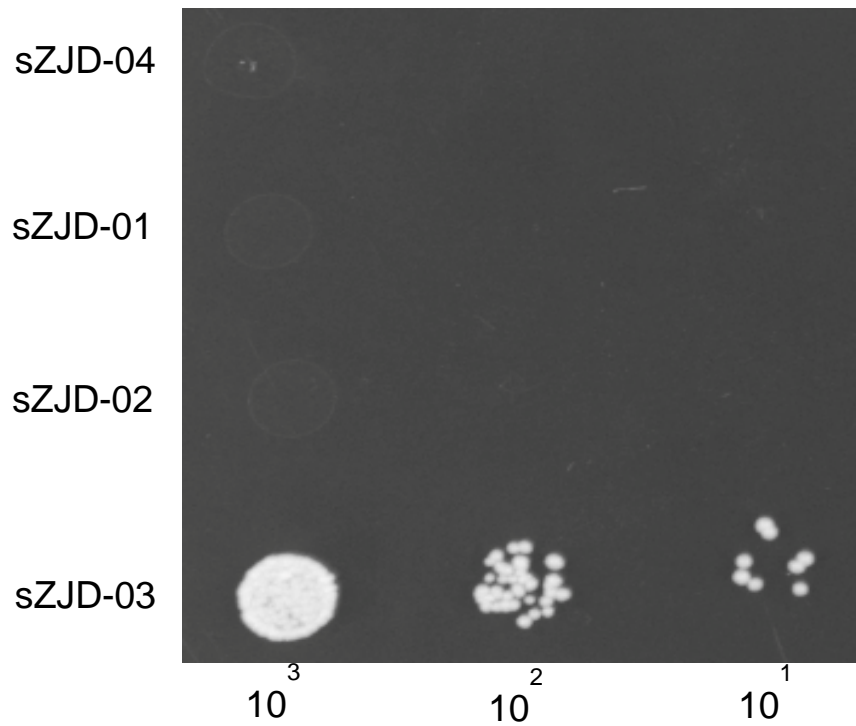

**Supplementary Figure 1.** Serial dilution of the different strains were grown on synthetic medium agar plates with 20 g l<sup>-1</sup> glucose. sZJD-01: strain expressing PO gene from *S. pneumoniae* and PTA gene from *S. enterica*. sZJD-02: strain expressing PO gene from *L. plantarum* and PTA gene from *S. enterica*. sZJD-03: strain expressing PO gene from *A. viridans* and PTA gene from *S. enterica*. sZJD-04: control strain.

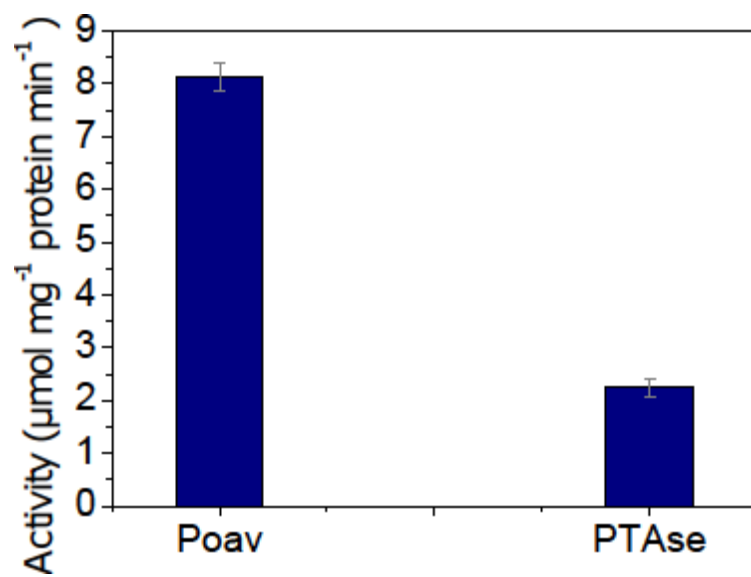

**Supplementary Figure 2.** Enzyme activity of pyruvate oxidase and phosphotransacetylase in strain sZJD-03 cell-free extract. The data represent the mean  $\pm$  s.d. of biological duplicates.

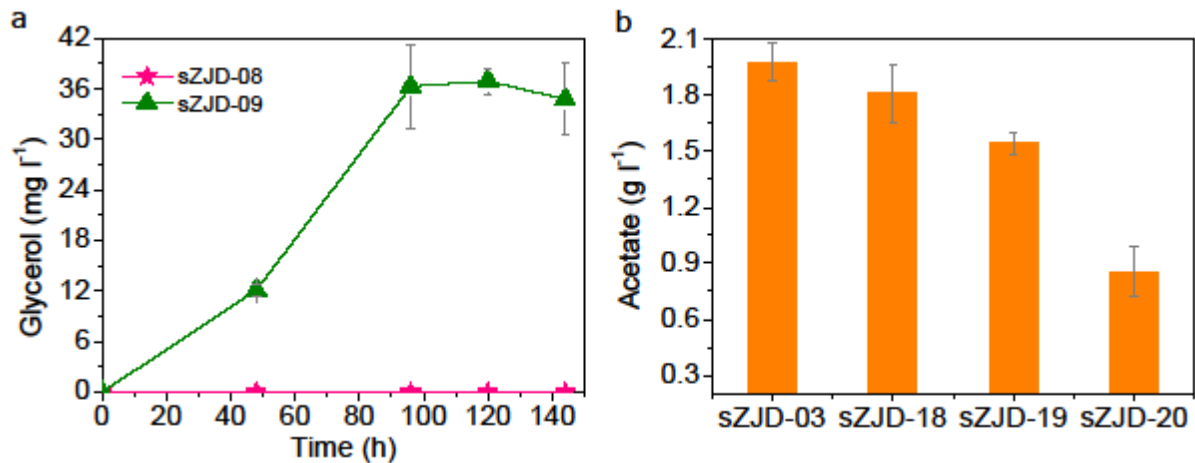

**Supplementary Figure 3.** Identification of promiscuous enzyme(s) for acetate accumulation. **(a)** Glycerol concentration in the medium of strain IMI076 harbouring the control plasmid (sZJD-08) and the POavPTase containing plasmid (sZJD-09), respectively. To identify the promiscuous enzyme(s) in Pdc<sup>-</sup> *S. cerevisiae* IMI076 was used, because it could grow in excess glucose media without introducing exogenous acetyl-CoA producing pathway and be a comparable control strain. The data represent the mean  $\pm$  s.d. of biological triplicates. Glycerol was produced by strain IMI076 containing the POavPTase pathway in contrast to IMI076 with an empty plasmid. Glycerol 3-phosphate phosphatase (GPP) is responsible for catalyzing the conversion of glycerol 3-phosphate to glycerol. The structure of acetate-phosphate is similar to that of glycerol 3-phosphate, and we therefore suspected that GPP might be promiscuous involved in converting acetyl-phosphate to acetate. **(b)** Extracellular acetate concentration of Pdc<sup>-</sup> strains with the POav/PTase pathway carrying deleting in promiscuous phosphatase genes *GPP1* and *GPP2* in a synthetic medium containing 20 g l<sup>-1</sup> glucose. sZJD-03: control, sZJD-18: *GPP1* single deletion, sZJD-19: *GPP2* single deletion, sZJD-20: *GPP1* and *GPP2* double deletion.

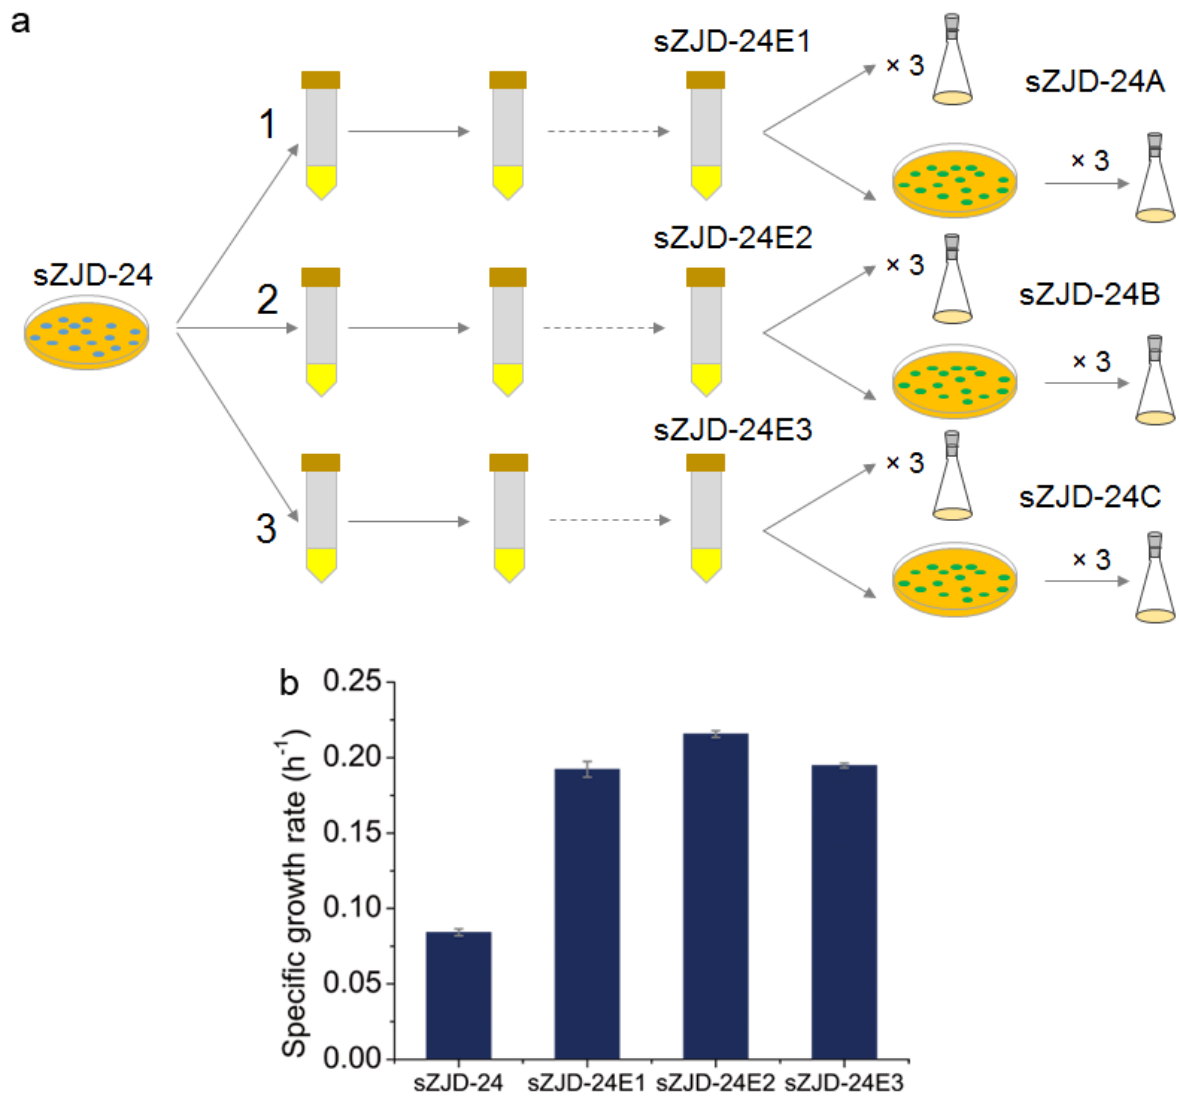

**Supplementary Figure 4.** ALE experimental setup and determination of specific growth rate. **(a)** Experimental procedure for ALE which generated three evolved populations (sZJD-24E1, sZJD-24E2 and sZJD-24E3).  $\times 3$  means 3 replicates and 3 clones were used for determine the specific growth rate. **(b)** The specific growth rate of three evolved populations and starting strain sZJD-24.

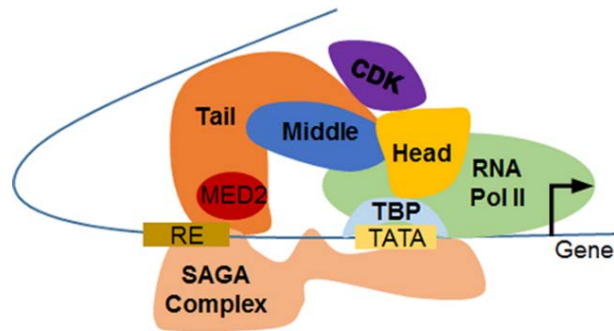

**Supplementary Figure 5.** Transcriptional activation mode of TATA-containing, SAGA-dependent genes, which requires tail module, SAGA complex, activators. Blue line indicates DNA.

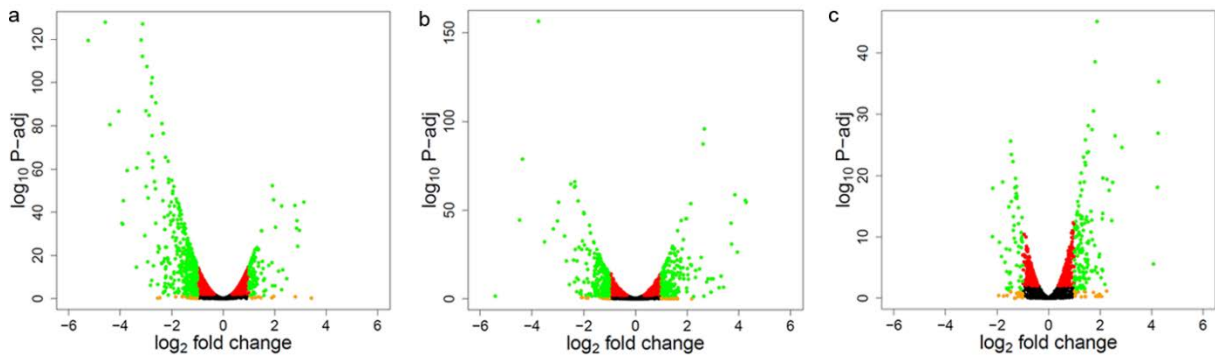

**Supplementary Figure 6.** Volcano plot of transcriptional changes of strains sZJD-28 (a), sZJD-27(b) and sZJD-26 (c) compared with strain sZJD-25. Green dots:  $\text{padj} < 0.01$  &  $\text{abs}(\log_2 \text{FC}) > 1$ , red dots:  $\text{padj} < 0.01$  &  $\text{abs}(\log_2 \text{FC}) \leq 1$ , yellow dots:  $\text{padj} \geq 0.01$  &  $\text{abs}(\log_2 \text{FC}) > 1$ , black dots:  $\text{padj} \geq 0.01$  &  $\text{abs}(\log_2 \text{FC}) \leq 1$ .

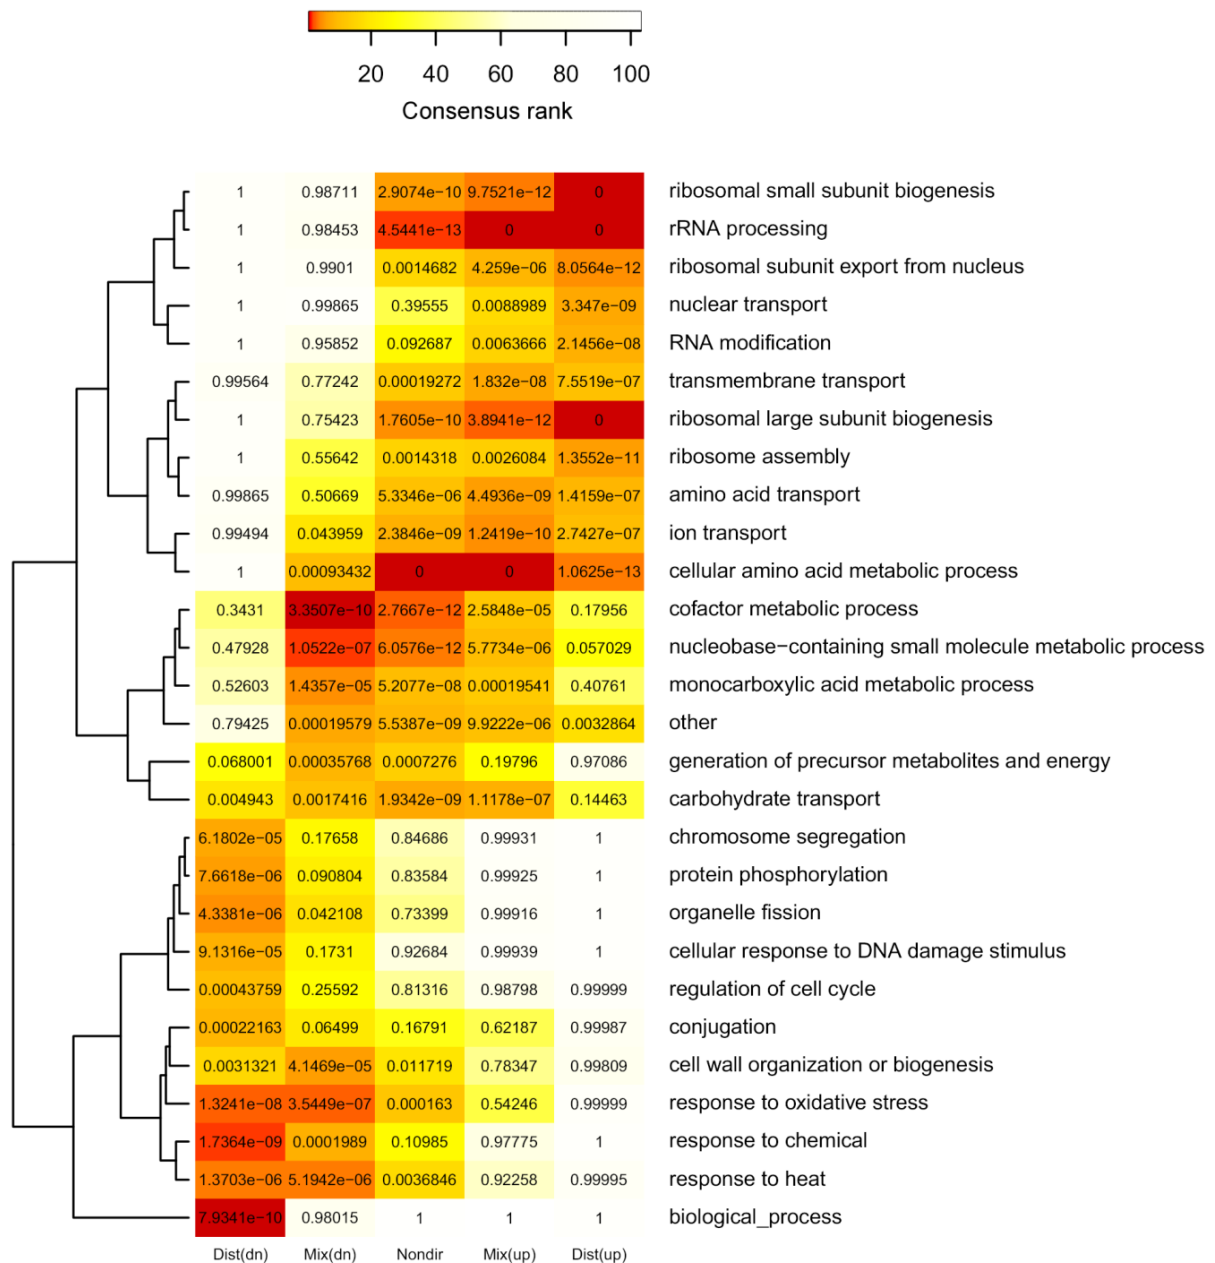

**Supplementary Figure 7.** Reporter GO term analysis of the transcription profiles of strain sZJD-27. The color key shows the rank of GO terms and the significance (p-value) of the GO term is included in each cell of the heatmap. GO terms that have a consensus rank  $\leq 10$  in any of the groups (distinct-directional down, mixed-directional down, non-directional change, mix-directional up and distinct-directional up) are shown in the heatmap.

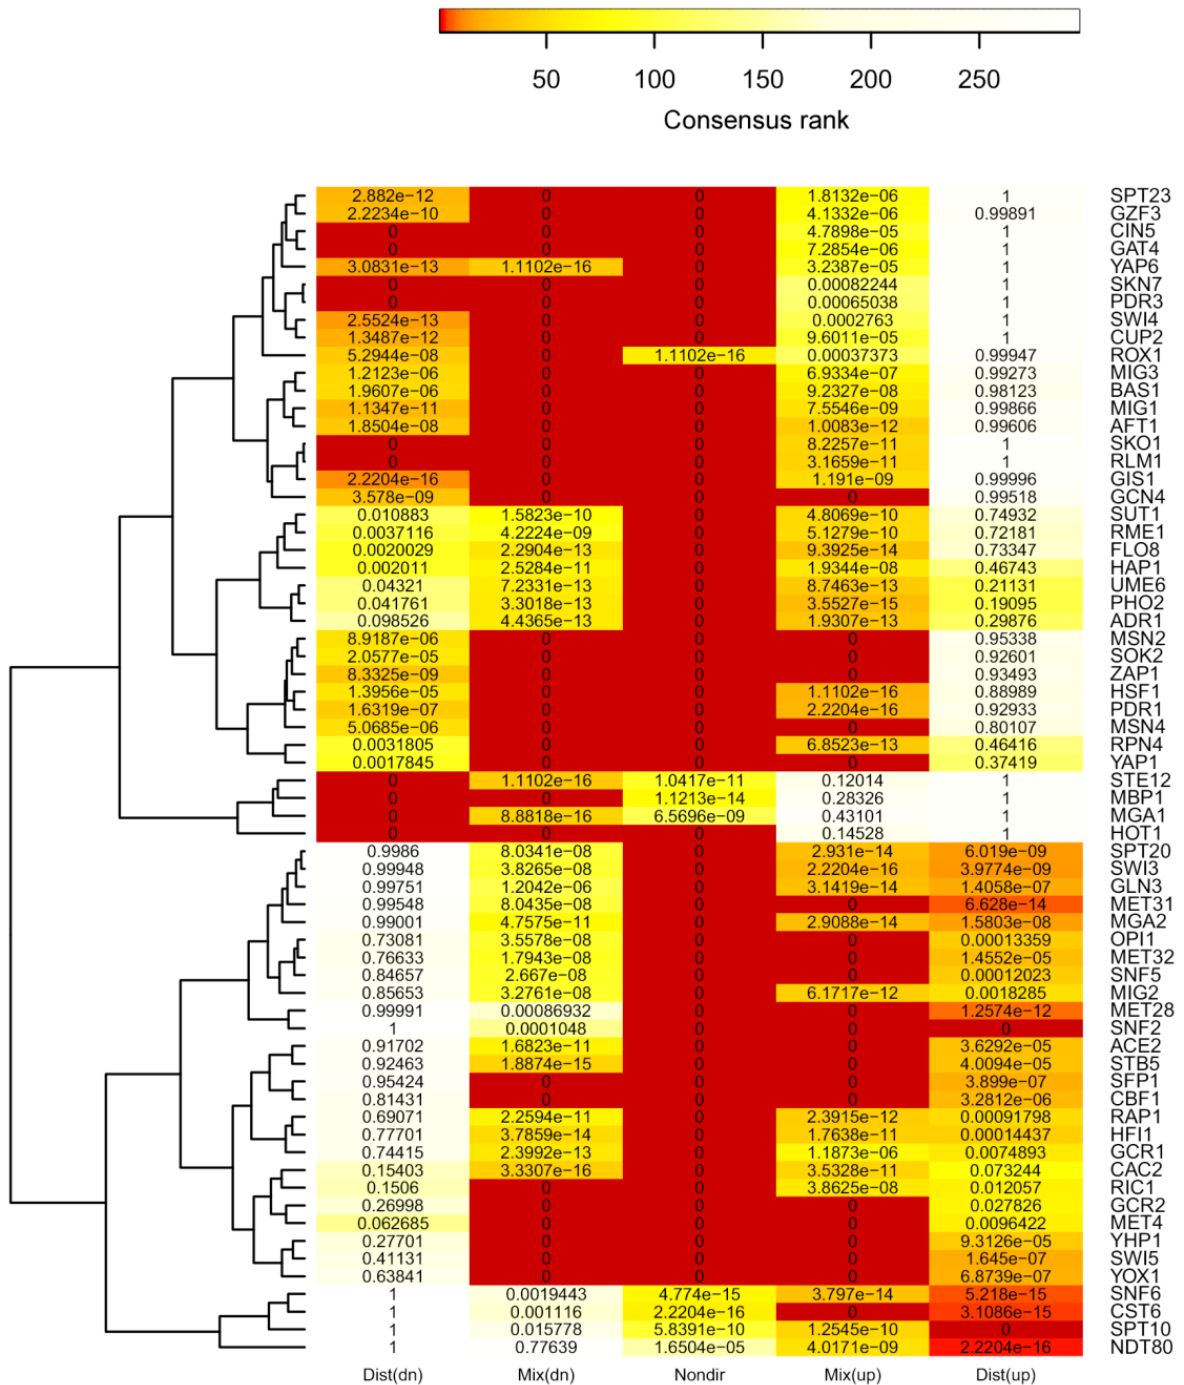

**Supplementary Figure 8.** Reporter transcription factors (TFs) analysis of strain sZJD-27 compared with control strain. The color key shows the rank of TFs and the significance (p-value) of the TF is included in each cell of the heatmap. TFs that have a consensus rank  $\leq 5$  in any of the groups (distinct-directional down, mixed-directional down, non-directional change, mix-directional up and distinct-directional up) are shown in the heatmap.



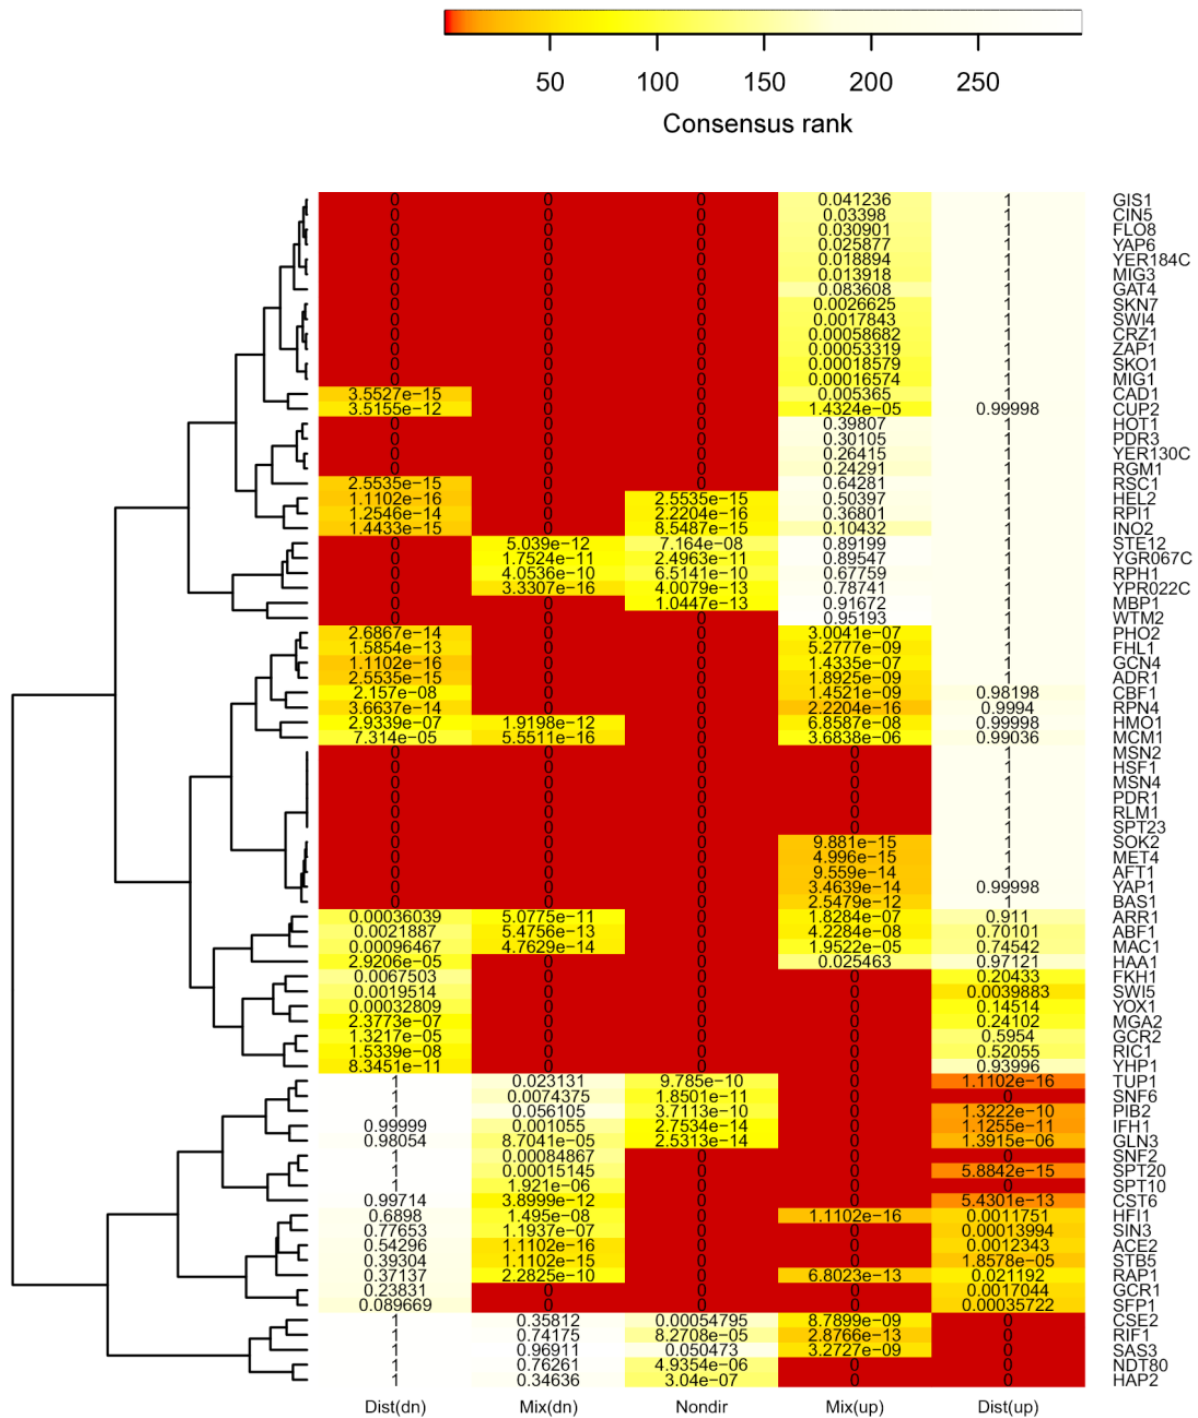

**Supplementary Figure 9.** Reporter transcription factors (TFs) analysis of strain sZJD-28 compared with control strain. The color key shows the rank of TFs and the significance (p-value) of the TF is included in each cell of the heatmap. TFs that have a consensus rank  $\leq 5$  in any of the groups (distinct-directional down, mixed-directional down, non-directional change, mix-directional up and distinct-directional up) are shown in the heatmap.

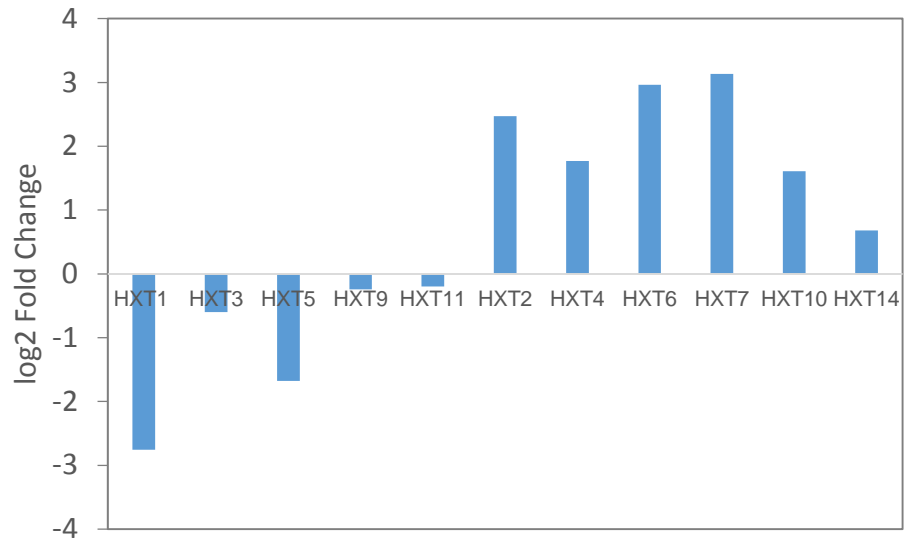

**Supplementary Figure 10.** Fold changes profiles of strain sZJD-28 compared with control strain sZJD-25.

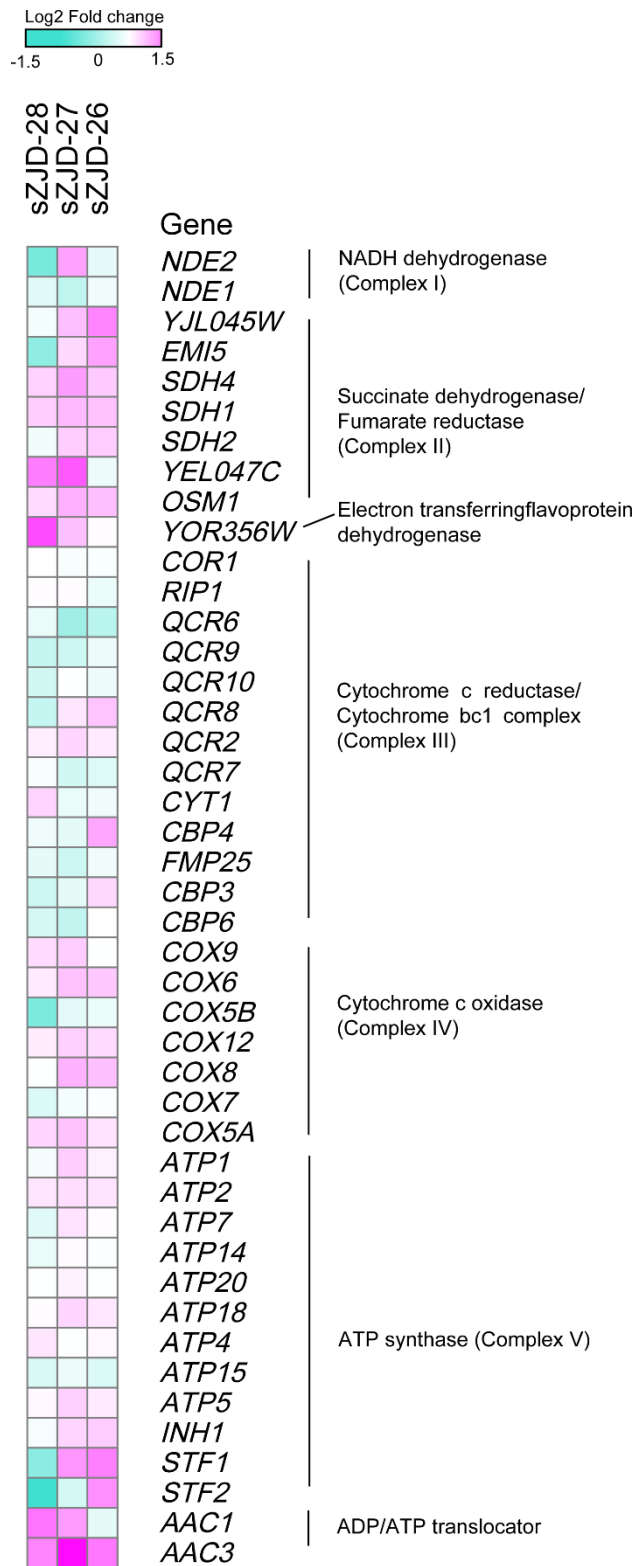

**Supplementary Figure 11.** Transcriptional levels of genes related to oxidative phosphorylation in sZJD-28, sZJD-27 and sZJD-26 compared with sZJD-25.

**Supplementary Table 1.** Strains used in this study

| Strains              | Genotype or characteristic                                                           | Source                                   |
|----------------------|--------------------------------------------------------------------------------------|------------------------------------------|
| CEN.PK YMZ-E1        | MATa <i>ura3-52 his3-Δ1 pdc1Δ pdc5Δ pdc6Δ</i>                                        | <sup>1</sup>                             |
| IMI076               | MATa <i>pdc1Δ(-6,-2)::loxP pdc5Δ(-6,-2)::loxP pdc6Δ(-6,-2)::loxP ura3-52 MTH1-ΔT</i> | <sup>2</sup>                             |
| CEN.PK 113-11C       | MATa <i>MAL2-8c SUC2 his3Δ1 ura3-52</i>                                              | Kötter, University of Frankfurt, Germany |
| POspPTAse<br>sZJD-01 | CEN.PK YMZ-E1 with pZJD-01                                                           | This study                               |
| POlpPTAse<br>sZJD-02 | CEN.PK YMZ-E1 with pZJD-02                                                           | This study                               |
| POavPTAse<br>sZJD-03 | CEN.PK YMZ-E1 with pZJD-03                                                           | This study                               |
| Control<br>sZJD-04   | CEN.PK YMZ-E1 with pSP-GM1                                                           | This study                               |
| sZJD-08              | IMI076 with pSP-GM1                                                                  | This study                               |
| sZJD-09              | IMI076 with pZJD-03                                                                  | This study                               |
| sZJD-11              | CEN.PK YMZ-E1( <i>acs2Δ::TEF1p-POav-ADH1t acs1Δ::TEF1p-PTAse-CYC1t</i> )             | This study                               |
| sZJD-12              | sZJD-11(pIST05)                                                                      | This study                               |
| sZJD-13              | sZJD-11(pYC1)                                                                        | This study                               |
| sZJD-14              | CEN.PK 113-11C(pIST05)                                                               | This study                               |
| HPY01                | CEN.PK 113-11C(pYC1)                                                                 | <sup>3</sup>                             |
| sZJD-15              | CEN.PK YMZ-E1( <i>gpp1Δ</i> )                                                        | This study                               |
| sZJD-16              | CEN.PK YMZ-E1( <i>gpp2Δ</i> )                                                        | This study                               |
| sZJD-17              | CEN.PK YMZ-E1( <i>gpp1Δ gpp2Δ</i> )                                                  | This study                               |
| sZJD-18              | sZJD-15(pZJD-03)                                                                     | This study                               |
| sZJD-19              | sZJD-16(pZJD-03)                                                                     | This study                               |
| sZJD-20              | sZJD-17(pZJD-03)                                                                     | This study                               |
| sZJD-21              | sZJD-11( <i>gpp1Δ</i> )                                                              | This study                               |
| sZJD-22              | sZJD-11( <i>gpp2Δ</i> )                                                              | This study                               |
| sZJD-23              | sZJD-11( <i>gpp1Δ gpp2Δ</i> )                                                        | This study                               |
| sZJD-24              | sZJD-23( <i>XI-5::URA3 X-2::HIS3</i> )                                               | This study                               |
| sZJD-24E1            | Evolved sZJD-24                                                                      | This study                               |
| sZJD-24E2            | Evolved sZJD-24                                                                      | This study                               |
| sZJD-24E3            | Evolved sZJD-24                                                                      | This study                               |
| sZJD-24A1            | Clone from evolved sZJD-24E1                                                         | This study                               |
| sZJD-24A2            | Clone from evolved sZJD-24E1                                                         | This study                               |
| sZJD-24A3            | Clone from evolved sZJD-24E1                                                         | This study                               |
| sZJD-24B1            | Clone from evolved sZJD-24E2                                                         | This study                               |
| sZJD-24B2            | Clone from evolved sZJD-24E2                                                         | This study                               |
| sZJD-24B3            | Clone from evolved sZJD-24E2                                                         | This study                               |
| sZJD-24C1            | Clone from evolved sZJD-24E3                                                         | This study                               |
| sZJD-24C2            | Clone from evolved sZJD-24E3                                                         | This study                               |
| sZJD-24C3            | Clone from evolved sZJD-24E3                                                         | This study                               |
| sZJD-25              | sZJD-23( <i>X-2::KanMX-TEF1p-Cas9-CYC1t</i> )                                        | This study                               |
| sZJD-26              | sZJD-25( <i>GPD1<sup>W71*</sup></i> )                                                | This study                               |
| sZJD-27              | sZJD-25( <i>MED2<sup>*432Y</sup></i> )                                               | This study                               |
| sZJD-28              | sZJD-25( <i>MED1<sup>*432Y</sup>GPD1<sup>W71*</sup></i> )                            | This study                               |

**Supplementary Table 2.** Growth rate and ethanol yield on glucose of Crabtree negative and positive

| Species                               | Yield: EtOH/Glu (g g <sup>-1</sup> ) | Growth rate (h <sup>-1</sup> ) |
|---------------------------------------|--------------------------------------|--------------------------------|
| <i>S. cerevisiae</i> *                | 0.00                                 | 0.109                          |
| <i>Kluyveromyces nonfermentans</i> ** | 0.00                                 | 0.101                          |
| <i>Eremothecium sinicaudum</i> A2**   | 0.00                                 | 0.117                          |
| <i>E. sinicaudum</i> A1**             | 0.00                                 | 0.122                          |
| <i>K. Lactis</i> A2**                 | 0.00                                 | 0.255                          |
| <i>K. Marxianus</i> B**               | 0.00                                 | 0.269                          |
| <i>K. Marxianus</i> A1**              | 0.00                                 | 0.314                          |
| <i>K. Wickerhamii</i> **              | 0.00                                 | 0.321                          |
| <i>Debaromyces vanriijiae</i> A1**    | 0.00                                 | 0.347                          |
| <i>K. aestuarii</i> **                | 0.00                                 | 0.429                          |
| <i>S. cerevisiae</i> A2**             | 0.38                                 | 0.289                          |

yeast

\* Data from this study, \*\*Data from previous work<sup>4</sup>.**Supplementary Table 3.** Mutations in evolved *S. cerevisiae* strains isolated from three populations

| Strain    | Mutations   |              |             |             |              |             |             |
|-----------|-------------|--------------|-------------|-------------|--------------|-------------|-------------|
| sZJD-24A1 | <i>MED2</i> | <i>HXK2</i>  | <i>EBP2</i> | <i>BEM3</i> | <i>ALG14</i> | <i>FAB1</i> | <i>MGA1</i> |
|           | *432Y       | Q195*        | T415S       | N673H       | R20S         | A620S       | M274R       |
|           | TAG-TAT     | CAA-TAA      | ACC-AGC     | AAT-CAT     | AGG-AGT      | GCT-TCT     | ATG-AGG     |
| sZJD-24A2 | <i>MED2</i> | <i>HXK2</i>  | <i>MCH2</i> | <i>NUD1</i> | <i>DIT2</i>  | <i>GTO1</i> |             |
|           | *432Y       | Q195*        | A63T        | G195G       | V24F         | F280Y       |             |
|           | TAG-TAT     | CAA-TAA      | GCT-ACT     | GGC-GGT     | GTC-TTC      | TTT-TAT     |             |
| sZJD-24B1 | <i>MED3</i> | <i>SIW14</i> | <i>MHO1</i> | <i>TPS2</i> |              |             |             |
|           | L156*       | W234*        | T160K       | Δ3bp        |              |             |             |
|           | TTG-TAG     | TGG-TGA      | ACG-AAG     | 2344-2346   |              |             |             |
| sZJD-24B2 | <i>MED3</i> | <i>SIW14</i> | <i>MHO1</i> | <i>AGP2</i> |              |             |             |
|           | L156*       | W234*        | T160K       | C204Y       |              |             |             |
|           | TTG-TAG     | TGG-TGA      | ACG-AAG     | TGT-TAT     |              |             |             |
| sZJD-24C1 | <i>MED2</i> | <i>GPD1</i>  | <i>DUN1</i> |             |              |             |             |
|           | *432Y       | W71*         | T57A        |             |              |             |             |
|           | TAG-TAT     | TGG-TAG      | ACA-GCA     |             |              |             |             |
| sZJD-24C2 | <i>MED2</i> | <i>GPD1</i>  |             |             |              |             |             |
|           | *432Y       | W71*         |             |             |              |             |             |
|           | TAG-TAT     | TGG-TAG      |             |             |              |             |             |
| sZJD-24C3 | <i>MED2</i> | <i>GPD1</i>  |             |             |              |             |             |
|           | *432Y       | W71*         |             |             |              |             |             |
|           | TAG-TAT     | TGG-TAG      |             |             |              |             |             |

**Supplementary Table 4.** Plasmids used in this study

| Plasmids | Genotype or characteristic                                        | Source     |
|----------|-------------------------------------------------------------------|------------|
| pSP-GM1  | 2 $\mu$ m, <i>AmpR</i> , <i>URA3</i> , TEF1p,ADH1t, PGK1p, CYC1t  | 5          |
| pSP-GM2  | 2 $\mu$ m, <i>AmpR</i> , <i>URA3</i> , TEF1p, CYC1t, PGK1p, ADH1t | 5          |
| pZJD-01  | pSP-GM1-(TEF1p-POsp-ADH1t, PGK1p-PTase-CYC1t)                     | This study |
| pZJD-02  | pSP-GM1-(TEF1p-POlp-ADH1t, PGK1p-PTase-CYC1t)                     | This study |
| pZJD-03  | pSP-GM1-(TEF1p-POav-ADH1t, PGK1p-PTase-CYC1t)                     | This study |
| pIST05   | pSP-GM1-(TEF1p-FarnSYNcj-ADH1t, PGK1p-tHMG1-CYC1t)                | 6          |
| pYC1     | pSP-GM2-(TEF1p-MCRca-CYC1t)                                       | 3          |
| pUG6     | loxP-pAgTEF1-kanMX-tAgTEF1-loxP, <i>AmpR</i> , ori                | 7          |
| pCfB2312 | CEN/ARS, KanMX, <i>AmpR</i> , TEF1p, Cas9, CYC1t                  | 8          |

**Supplementary References**

- Zhang, Y. *et al.* Adaptive mutations in sugar metabolism restore growth on glucose in a pyruvate decarboxylase negative yeast strain. *Microb. Cell Fact.* **14**, 116, doi:10.1186/s12934-015-0305-6 (2015).
- Oud, B. *et al.* An internal deletion in *MTH1* enables growth on glucose of pyruvate-decarboxylase negative, non-fermentative *Saccharomyces cerevisiae*. *Microb. Cell Fact.* **11**, 131, doi:10.1186/1475-2859-11-131 (2012).
- Chen, Y., Bao, J. C., Kim, I. K., Siewers, V. & Nielsen, J. Coupled incremental precursor and co-factor supply improves 3-hydroxypropionic acid production in *Saccharomyces cerevisiae*. *Metab. Eng.* **22**, 104-109, doi:10.1016/j.ymben.2014.01.005 (2014).
- Hagman, A., Sall, T., Compagno, C. & Piskur, J. Yeast "Make-Accumulate-Consume" Life Strategy Evolved as a Multi-Step Process That Predates the Whole Genome Duplication. *Plos One* **8**, e68734, doi:ARTN e68734 10.1371/journal.pone.0068734 (2013).
- Chen, Y., Partow, S., Scalcinati, G., Siewers, V. & Nielsen, J. Enhancing the copy number of episomal plasmids in *Saccharomyces cerevisiae* for improved protein production. *FEMS Yeast Res.* **12**, 598-607, doi:10.1111/j.1567-1364.2012.00809.x (2012).
- Tippmann, S., Scalcinati, G., Siewers, V. & Nielsen, J. Production of farnesene and santalene by *Saccharomyces cerevisiae* using fed-batch cultivations with RQ-controlled feed. *Biotechnol. Bioeng.* **113**, 72-81, doi:10.1002/bit.25683 (2016).
- Guldener, U., Heck, S., Fiedler, T., Beinhauer, J. & Hegemann, J. H. A new efficient gene disruption cassette for repeated use in budding yeast. *Nucleic Acids Res.* **24**, 2519-2524, doi:DOI 10.1093/nar/24.13.2519 (1996).
- Stovicek, V., Borodina, I. & Forster, J. CRISPR–Cas system enables fast and simple genome editing of industrial *Saccharomyces cerevisiae* strains. *Metab. Eng. Commun.* **2**, 13-22 (2015).
