# Supplementary material for: Global rewiring of cellular metabolism renders Saccharomyces cerevisiae Crabtree negative
Source: PubMed Central journal article supplement (PMC6076296; doi:10.1038/s41467-018-05409-9), 2018-08-03
Supplement: 41467_2018_5409_MOESM3_ESM.pdf [file 41467_2018_5409_MOESM3_ESM.pdf]

### **Descriptions of Additional Supplementary Files**

File Name: Supplementary Dataset 1

Description: GO Slim Mapper\_shared 114 TATA-containing genes

File Name: Supplementary Dataset 2

Description: Codon optimized genes' sequences and primers used in this study
